# Supplementary material for: γδ T cells for cancer immunotherapy: A systematic review of clinical trials
Source: PubMed Central journal article supplement — Oncoimmunology. 2014 Jan 17;3:e27572. doi: 10.4161/onci.27572 (PMC3984269; doi:10.4161/onci.27572), 2014-01-17
Supplement: onci-3-e27572-s01.pdf [file onci-3-e27572-s01.pdf]

## **Supplemental Material to:**

**Jonathan PH Fisher, Jennifer Heuijerjans, Mengyong Yan,  
Kent Gustafsson, John Anderson**

**$\gamma\delta$  T cells for cancer immunotherapy  
A systematic review of clinical trials**

**Oncolmunology 2013; 2(12)**

**<http://dx.doi.org/10.4161/onci.27572>**

**[http://www.landesbioscience.com/journals/oncoimmunology/  
article/27572/](http://www.landesbioscience.com/journals/oncoimmunology/article/27572/)**

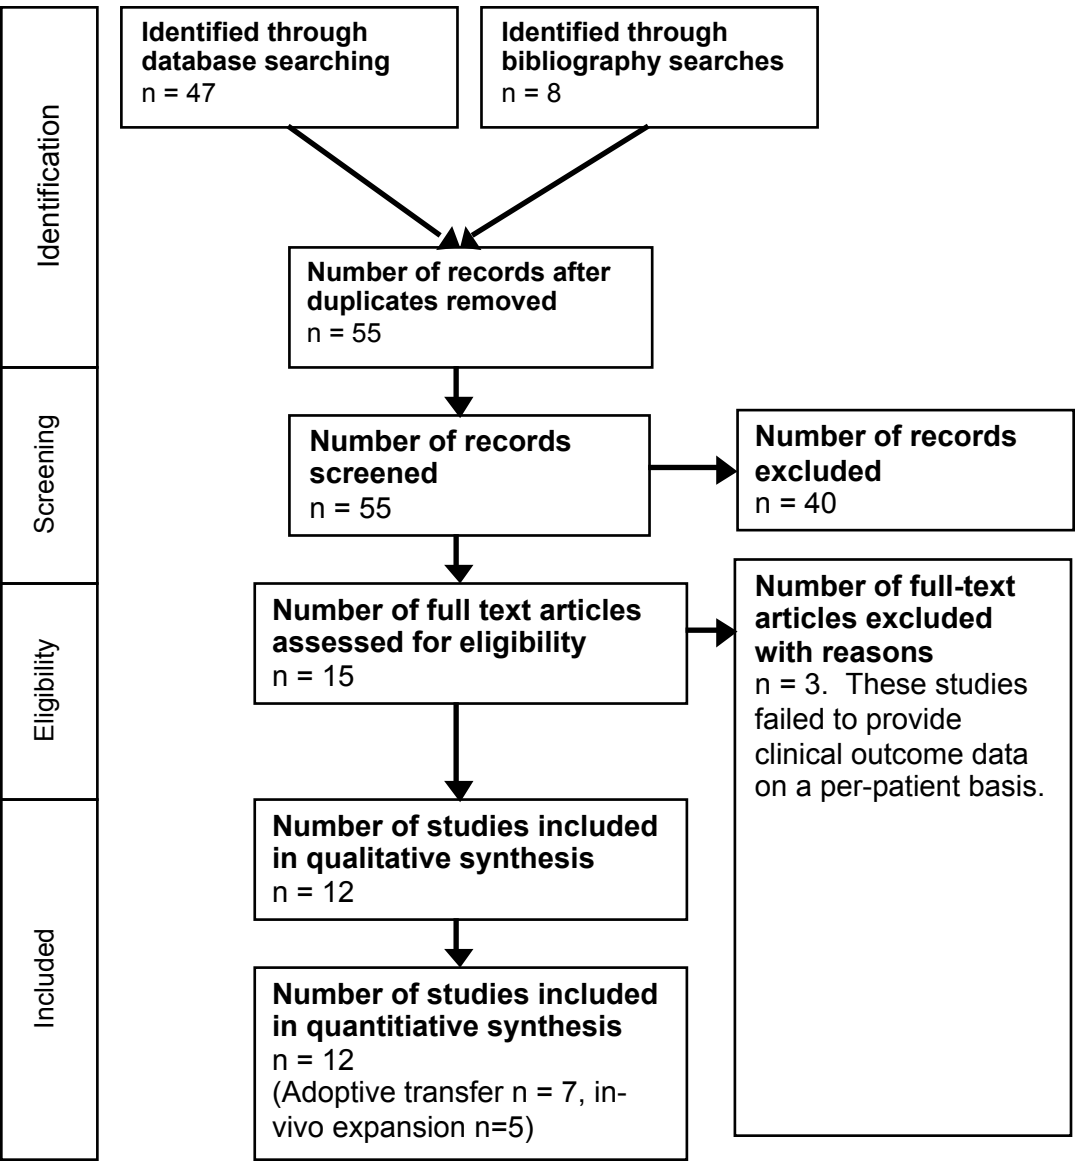

**Supplementary Figure 1.** PRISMA flow-sheet of inclusion in systematic review.

**Supplementary Table 1. Comparison of IL-2 administration regimens for the expansion of  $\gamma\delta$  T cells in patients with haematological malignancies.\***

| Method of delivery               | Disease | Dose range of IL-2 (MU/m <sup>2</sup> ) | Number of cycles | Total IL-2 dose per cycle (MU/m <sup>2</sup> ) | % increase in $\gamma\delta$ T numbers in-vitro at D8 | Clinical Response |
|----------------------------------|---------|-----------------------------------------|------------------|------------------------------------------------|-------------------------------------------------------|-------------------|
| Continuous s.c. infusion on D3-8 | MM      | 0.25-0.5                                | 2                | 1.5-3.0                                        | <20%                                                  | PD                |
|                                  | CLL     | 0.25-3.0                                | 6                | 1.5-18                                         | 20-100%                                               | SD                |
|                                  | CLL     | 0.25-0.5                                | 2                | 1.5-3.0                                        | <20%                                                  | PD                |
|                                  | IC      | 0.5                                     | 1                | 3                                              | <20%                                                  | PD                |
|                                  | MM      | 0.5                                     | 1                | 3                                              | <20%                                                  | NE                |
|                                  | CLL     | 0.5                                     | 1                | 3                                              | ND                                                    | PD                |
|                                  | CLL     | 1.0-2.0                                 | 2                | 6.0-12.0                                       | ND                                                    | PD                |
|                                  | MM      | 1                                       | 1                | 6                                              | ND                                                    | PD                |
|                                  | MZL     | 1                                       | 1                | 6                                              | ND                                                    | PD                |
|                                  | MM      | 2.0-3.0                                 | 2                | 12.0-18.0                                      | ND                                                    | PD                |
| IV bolus on D1-6                 | MM      | 0.25                                    | 1                | 1.5                                            | 20-100%                                               | PD                |
|                                  | MM      | 0.25                                    | 2                | 1.5                                            | 20-100%                                               | PD                |
|                                  | FCL     | 0.25                                    | 1                | 1.5                                            | 100-200%                                              | PD                |
|                                  | FCL     | 0.5-1.0                                 | 4                | 3.0-6.0                                        | >200%                                                 | SD                |
|                                  | MM      | 0.5-2.0                                 | 9                | 3.0-12.0                                       | >200%                                                 | PR                |
|                                  | MM      | 0.5                                     | 1                | 3                                              | 20-100%                                               | PD                |
|                                  | MZL     | 1                                       | 4                | 6                                              | >200%                                                 | SD                |
|                                  | FCL     | 2                                       | 4                | 12                                             | >200%                                                 | PR                |
|                                  | FCL     | 1.0-2.0                                 | 8                | 6.0-12.0                                       | 20-100%                                               | PR                |

\*Cycles consisted of pamidronate 90 mg on D1 of a 21-day cycle, with IL-2 administered as described above. CLL, chronic lymphocytic leukemia; FCL, follicular center lymphoma; IC, immunocytoma; IL-2, interleukin-2; MM, multiple myeloma; MZL, mantle zone lymphoma; NE, not evaluable; PR, partial response; SD, stable disease.

**Supplementary Table 2. Disease outcome from clinical trials of  $\gamma\delta$  T cell immunotherapy.\***

| Treatment type    | Disease                | n         | CR       |            | PR       |            | SD        |             | PD |             | Missing data (n) |
|-------------------|------------------------|-----------|----------|------------|----------|------------|-----------|-------------|----|-------------|------------------|
|                   |                        |           | n        | %          | n        | %          | n         | %           | n  | %           |                  |
| Adoptive transfer | <b>Advanced RCC</b>    | <b>28</b> | <b>1</b> | <b>3.6</b> | <b>0</b> | <b>0.0</b> | <b>9</b>  | <b>32.1</b> | 11 | <b>39.3</b> | <b>7</b>         |
|                   | <b>Advanced NSCLC</b>  | <b>25</b> | <b>0</b> | <b>0.0</b> | <b>0</b> | <b>0.0</b> | <b>13</b> | <b>52.0</b> | 11 | <b>44.0</b> | <b>1</b>         |
|                   | Metastatic melanoma    | 7         | 0        | 0.0        | 0        | 0.0        | 2         | 28.6        | 4  | 57.1        | 1                |
|                   | Multiple myeloma       | 6         | 0        | 0.0        | 0        | 0.0        | 4         | 66.7        | 2  | 33.3        | 0                |
|                   | Colon cancer           | 3         | 0        | 0.0        | 0        | 0.0        | 0         | 0.0         | 3  | 100.0       | 0                |
|                   | Advanced breast cancer | 2         | 1        | 50.0       | 1        | 50.0       | 0         | 0.0         | 0  | 0.0         | 0                |
|                   | Ovarian cancer         | 2         | 0        | 0.0        | 0        | 0.0        | 1         | 50.0        | 1  | 50.0        | 0                |
|                   | Cholangiocarcinoma     | 1         | 0        | 0.0        | 0        | 0.0        | 0         | 0.0         | 1  | 100.0       | 0                |

|                   |                                 |           |          |            |          |             |           |             |          |             |          |
|-------------------|---------------------------------|-----------|----------|------------|----------|-------------|-----------|-------------|----------|-------------|----------|
|                   | Duodenal carcinoma              | 1         | 0        | 0.0        | 0        | 0.0         | 0         | 0.0         | 1        | 100.0       | 0        |
|                   | Adenocarcinoma                  | 1         | 0        | 0.0        | 0        | 0.0         | 0         | 0.0         | 1        | 100.0       | 0        |
|                   | Cervical cancer                 | 1         | 0        | 0.0        | 1        | 100.0       | 0         | 0.0         | 0        | 0.0         | 0        |
|                   | Overall                         | 77        | 2        | 2.9        | 2        | 2.9         | 29        | 42.6        | 35       | 51.4        | 9        |
|                   |                                 |           |          |            |          |             |           |             |          |             |          |
| In vivo expansion | <b>Advanced RCC</b>             | <b>19</b> | <b>0</b> | <b>0.0</b> | <b>0</b> | <b>0.0</b>  | <b>10</b> | <b>52.6</b> | <b>5</b> | <b>26.3</b> | <b>4</b> |
|                   | <b>Advanced prostate cancer</b> | <b>18</b> | <b>0</b> | <b>0.0</b> | <b>4</b> | <b>22.2</b> | <b>5</b>  | <b>27.8</b> | <b>3</b> | <b>16.7</b> | <b>6</b> |
|                   | Multiple myeloma                | 14        | 0        | 0.0        | 1        | 7.1         | 1         | 7.1         | 11       | 85.7        | 1        |
|                   | Advanced breast cancer          | 10        | 0        | 0.0        | 1        | 10.0        | 2         | 20.0        | 1        | 10.0        | 6        |
|                   | AML                             | 8         | 0        | 0.0        | 2        | 25.0        | 2         | 25.0        | 3        | 37.5        | 1        |
|                   | CLL                             | 4         | 0        | 0.0        | 0        | 0.0         | 1         | 25.0        | 3        | 75.0        | 0        |
|                   | FCL                             | 4         | 0        | 0.0        | 2        | 50.0        | 1         | 25.0        | 1        | 25.0        | 0        |
|                   | Mantle zone lymphoma            | 2         | 0        | 0.0        | 0        | 0.0         | 0         | 0.0         | 2        | 100.0       | 0        |
|                   | Immunocytoma                    | 1         | 0        | 0.0        | 0        | 0.0         | 0         | 0.0         | 1        | 100.0       | 0        |
|                   | Overall                         | 80        | 0        | 0.0        | 10       | 16.1        | 22        | 35.4        | 30       | 48.3        | 18       |

\*Trials using similar treatment protocols (in-vivo expansion of  $\gamma\delta$ T cells or adoptive transfer of  $\gamma\delta$ T cell enriched populations) have been pooled to give an overview of efficacy. AML, acute myeloid leukemia; CLL, chronic lymphocytic leukemia; CR, complete response; FCL, follicular center lymphoma; IL-2, interleukin-2; NSCLC, non-small cell lung carcinoma; PD, progressive disease; PR, partial response; RCC, renal cell carcinoma; SD, stable disease.

**Supplementary Table 3. Disease outcome from clinical trials of  $\gamma\delta$  T cell immunotherapy, stratified according the ability of  $\gamma\delta$  T cells to expand in vitro.**

| $\gamma\delta$ T-cell therapy | Proliferation potential | CR |     | PR |      | SD |      | PD |      | Missing data |      |
|-------------------------------|-------------------------|----|-----|----|------|----|------|----|------|--------------|------|
|                               |                         | n  | %   | n  | %    | n  | %    | n  | %    | n            | %    |
| <b>Drug treatment</b>         | Positive                | 0  | 0   | 5  | 16.2 | 8  | 25.8 | 17 | 54.8 | 1            | 3.2  |
|                               | Undetermined            | 0  | 0   | 5  | 8.1  | 14 | 2.9  | 13 | 26.5 | 17           | 34.7 |
| <b>Adoptive transfer</b>      | Positive                | 0  | 0   | 0  | 0.0  | 17 | 48.5 | 17 | 48.5 | 1            | 3.0  |
|                               | Undetermined            | 2  | 5.0 | 2  | 5.0  | 12 | 30.0 | 18 | 45.0 | 8            | 20.0 |

**Abbreviations:** CR, complete response; PD, progressive disease; PR, partial response; RCC, renal cell carcinoma; SD, stable disease.
